# Supplementary material for: (S)-Oxiracetam is the Active Ingredient in Oxiracetam that Alleviates the Cognitive Impairment Induced by Chronic Cerebral Hypoperfusion in Rats
Source: PubMed Central journal article supplement (PMC5577264; doi:10.1038/s41598-017-10283-4), 2017-08-30
Supplement: 41598_2017_10283_MOESM1_ESM.pdf [file 41598_2017_10283_MOESM1_ESM.pdf]

1 **Supplementary Information**

2 **(S)-Oxiracetam is the Active Ingredient in Oxiracetam that Alleviates**  
3 **the Cognitive Impairment Induced by Chronic Cerebral**  
4 **Hypoperfusion in Rats**

5 Wan li <sup>a,b</sup>, Huihui Liu<sup>c</sup>, Hanjie Jiang <sup>a,b</sup>, Chen Wang <sup>a,b</sup>, Yongfei Guo <sup>a,b</sup>, Yi Sun <sup>a,b</sup>, Xin  
6 Zhao <sup>a,b</sup>, Xin Xiong<sup>d</sup>, Xianhua Zhang<sup>d</sup>, Ke Zhang <sup>a,b</sup>, Zongxiu Nie<sup>c\*</sup>, Xiaoping Pu <sup>a,b\*</sup>

7 <sup>a</sup> National Key Research Laboratory of Natural and Biomimetic Drugs, Peking  
8 University, Beijing 100191, PR China

9 <sup>b</sup> Department of Molecular and Cellular Pharmacology, School of Pharmaceutical  
10 Sciences, Peking University, Beijing 100191, PR China

11 <sup>c</sup> Key Laboratory of Analytical Chemistry for Living Biosystems, Institute of Chemistry  
12 Chinese Academy of Sciences, Beijing 100190, PR China

13 <sup>d</sup> Department of Pharmacy, Peking University Third Hospital, Beijing 100191, PR  
14 China

15 \* Corresponding authors:

16 Zongxiu Nie

17 Key Laboratory of Analytical Chemistry for Living Biosystems, Institute of Chemistry  
18 Chinese Academy of Sciences, Zhongguancun North First Street 2, Beijing, PR China,  
19 100190. Tel: +86-10-6261-8240; Fax: +86-10-6261-8240. E-mail: [znjie@iccas.ac.cn](mailto:znjie@iccas.ac.cn)

20 Xiaoping Pu

21 Department of Molecular and Cellular Pharmacology, School of Pharmaceutical  
22 Sciences, Peking University, 38 Xueyuan Rd. Haidian District, Beijing, China, 100191.  
23 Tel: +86-10-8280-2431; Fax: +86-10-8280-2431; E-mail: [11956170@pku.edu.cn](mailto:11956170@pku.edu.cn)

24

1 **Experimental conditions of Morris water maze**

2 The Morris water maze (SLY-ETS, Beijing Shuolinyuan Technology Co., Ltd.) was a  
3 black and circular pool (180 cm in diameter, 60 cm in height, filled to a depth of 45 cm  
4 with water at 23 °C ) that was geographically divided into four equal quadrants  
5 (Northeast, Southeast, Southwest, and Northwest) and each quadrant was marked by a  
6 different visual cue. Four points that were designed as North, South, East and West  
7 served as the starting points where the rats were gently lowered into the water, with its  
8 head facing the wall of the water maze. A circular black escape platform 10 cm in  
9 diameter (2 cm below the water surface) was placed in the center of the southwest  
10 quadrant and located at this location for escape throughout the testing period.

11 **Preparation of matrix**

12 To obtain 1, 5-DAN hydrochloride, 39.5 mg 1, 5-DAN was dissolved in 500 μL 1 mol/L  
13 hydrochloride and 4 mL distilled water by sonification. And then, 4.5 mL ethanol was  
14 added to the matrix solution.

15 **Preparation of mixture standard solution**

16 A mixture standard solution containing taurine, L-aspartate, L-glutamate, glutamine,  
17 N-acetylaspartate, ascorbic acid, citric acid, glutathione, AMP, ADP, ATP, GMP,  
18 glucose at 50 μM each was prepared in water.

19 **Tissue Homogenate Preparation.**

20 Brain tissue samples were weighed and homogenized (1 g: 5 m L) in 80% MeOH on  
21 ice using a ultrasonic processor. After centrifugation at 10,000 × g for 15 min at -4 °C,  
22 the supernatant was collected, and the precipitant was then extracted (1 g: 5 mL) with

1 CHCl<sub>3</sub>/MeOH (1:1, v/v) on ice by sonification for three time with an interval of 10min.  
2 Each sample was then, centrifuged at 10,000 × g for 15 min at -4°C, the supernatant  
3 was collected. Furthermore, two parts of supernatant were mixed and dried under  
4 nitrogen. The resultant samples were stored at -80°C. Samples were dissolved (1 g: 5 m  
5 L) in 80% MeOH and centrifuged at 18,000 × g for 10 min at -4 °C prior to analysis.  
6 50 μM 4-hydroxybenzophenone were used as the internal standard in this experiment.  
7  
8

1 **Supplementary Table. 1**

2 Multiple reaction monitoring (MRM) transition and optimal DP and CE for each metabolite.

| Analyte               | Parent ion | Product ion | DP(V) | CE (V) |
|-----------------------|------------|-------------|-------|--------|
| Taurine               | 124.1      | 79.8        | 60    | 30     |
| Aspartate             | 131.9      | 87.9        | 50    | 20     |
| Glutamine             | 144.9      | 128.1       | 55    | 15     |
| Glutamate             | 145.9      | 102.1       | 40    | 20     |
| N-acetylaspartate     | 173.9      | 130.1       | 45    | 18     |
| Ascorbic acid         | 174.9      | 114.9       | 45    | 18     |
| Glucose               | 179.1      | 89.05       | 80    | 15     |
| Citric acid           | 191        | 110.9       | 50    | 15     |
| Glutathione           | 306        | 143.1       | 80    | 23     |
| GMP                   | 362.0      | 211.0       | 70    | 27     |
| AMP                   | 346.1      | 133.9       | 100   | 50     |
| ADP                   | 426.2      | 134.1       | 90    | 35     |
| ATP                   | 506.1      | 158.9       | 100   | 40     |
| 4-Hydroxybenzophenone | 124.1      | 79.8        | 70    | 40     |

3 DP (V): declustering potential, CE (V): collision energy, AMP: adenosine monophosphate, ADP:

4 adenosine diphosphate, ATP: adenosine triphosphate, GMP: guanosine monophosphate.

5

1 **Supplementary Table. 2**

2 Peak area recorded for altered metabolites extracted from cortex of the 2-VO rats.

| Name                             | Peak area    |                |                |               |
|----------------------------------|--------------|----------------|----------------|---------------|
|                                  | Sham         | Model          | Rso            | So            |
| 1. Glucose (E+06)                | 7.92 ± 3.27  | 7.2 ± 2.19     | 10.24 ± 4.60   | 8.87 ± 3.57   |
| 2. Citric acid (E+06)            | 6.47 ± 1.40  | 14.94 ± 8.20*  | 8.83 ± 2.55    | 7.95 ± 2.54   |
| 3. ATP (E+03)                    | 1.65 ± 0.44  | 0.81 ± 0.30**  | 0.76 ± 0.32    | 0.79 ± 0.33   |
| 4. ADP (E+05)                    | 5.04 ± 0.68  | 0.83 ± 0.82*** | 2.94 ± 0.77**  | 2.57 ± 0.89** |
| 5. AMP (E+05)                    | 1.93 ± 0.53  | 0.15 ± 0.14*** | 0.43 ± 0.28*   | 0.66 ± 0.36** |
| 6. GMP (E+05)                    | 12.89 ± 1.65 | 2.43 ± 2.96*** | 5.96 ± 2.39*   | 7.12 ± 2.29*  |
| 7. Glutamate (E+07)              | 11.03 ± 0.95 | 5.47 ± 2.39*** | 8.14 ± 1.29*   | 8.43 ± 1.34*  |
| 8. Glutamine (E+06)              | 9.39 ± 1.99  | 3.38 ± 2.29*** | 7.23 ± 1.50**  | 6.87 ± 1.93*  |
| 9. Aspartate (E+07)              | 4.12 ± 0.54  | 1.35 ± 1.17*** | 2.31 ± 0.92    | 2.16 ± 0.62   |
| 10. N-acetylaspartate (E+06)     | 6.75 ± 0.35  | 1.15 ± 1.34*** | 3.44 ± 0.96**  | 3.30 ± 1.11*  |
| 11. Glutathione (E+06)           | 7.53 ± 2.07  | 0.80 ± 1.19*** | 3.88 ± 1.84**  | 3.86 ± 2.02** |
| 12. Ascorbic acid (E+07)         | 9.19 ± 0.63  | 3.31 ± 2.20*** | 8.10 ± 1.08*** | 7.47 ± 1.77** |
| 13. Taurine (E+07)               | 6.74 ± 0.56  | 3.64 ± 2.00**  | 6.52 ± 0.63*   | 5.81 ± 1.34   |
| 14. 4-Hydroxybenzophenone (E+04) | 3.17 ± 0.18  | 3.37 ± 0.06*   | 3.01 ± 0.23**  | 3.08 ± 0.24*  |

3 So: (S)-oxiracetam; Rso: oxiracetam. Data were presented as mean ± SD, n = 5 - 6 per group. One-  
 4 way ANOVA was used to analyze the differences of groups. ##*P* < 0.01, ###*P* < 0.001 vs. sham group;  
 5 \**P* < 0.05, \*\**P* < 0.01 vs. model group.

6  
 7  
 8  
 9  
 10  
 11  
 12

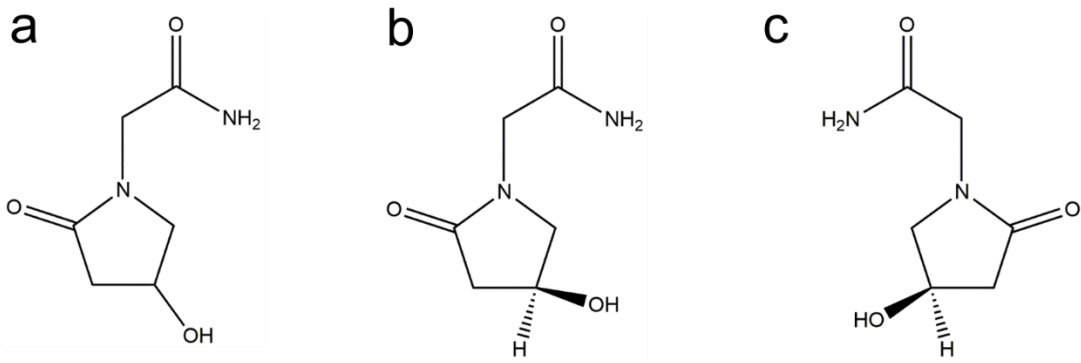

Supplementary Figure 1 | Structural formula of oxiracetam (a), (*S*)-oxiracetam (b) and (*R*)-oxiracetam (c).

1  
2  
3  
4  
5  
6  
7  
8  
9  
10

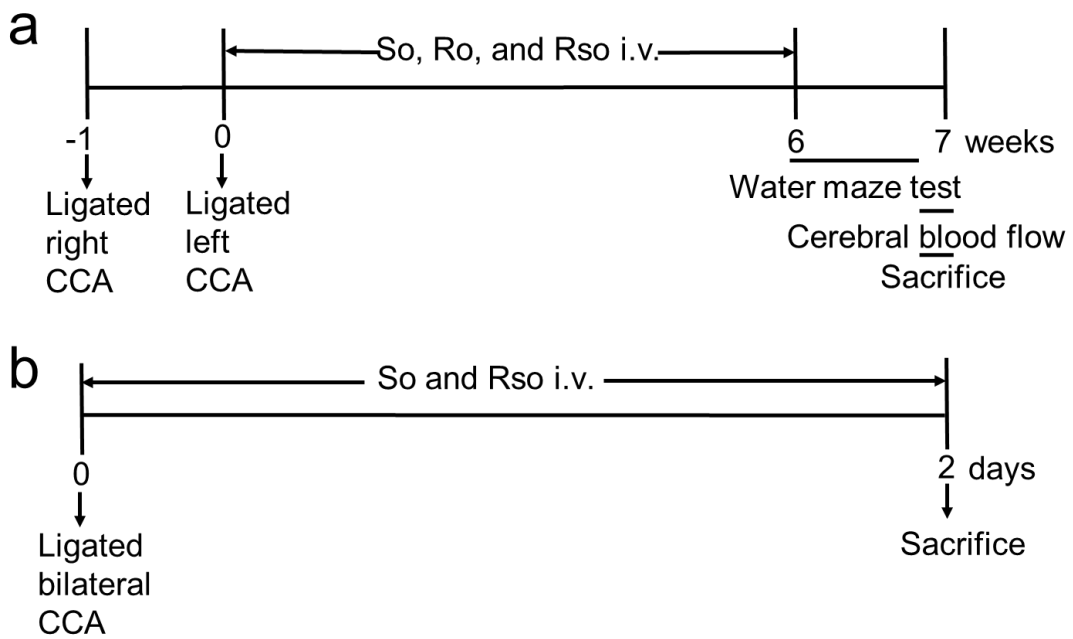

Supplementary Figure 2 | Diagrammatic representation of two experimental protocols. (a)

Evaluation of the nootropic effects of *S*-oxiracetam in the chronic phase of 2-VO model. (b) Mass

spectrometry imaging of small molecules in the acute phase of 2-VO model. So: (*S*)-oxiracetam; Ro:

(*R*)-oxiracetam; Rso: oxiracetam.

11  
12  
13  
14  
15  
16

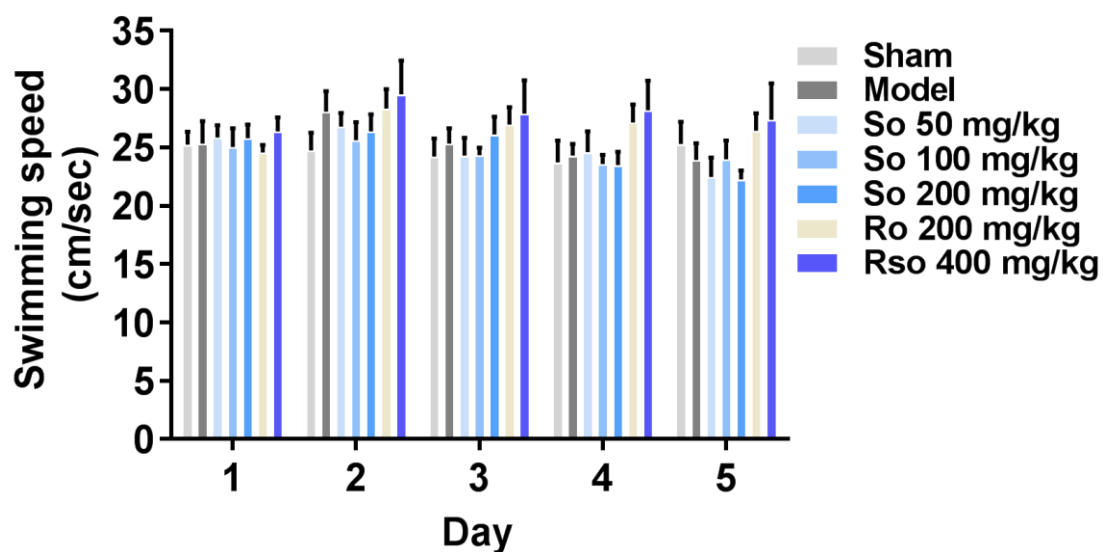

1  
2 **Supplementary Figure 3 | The swimming speed in the navigation test of Morris water maze**  
3 **test.** So: (*S*)-oxiracetam; Ro: (*R*)-oxiracetam; Rso: oxiracetam. Data were presented as mean  $\pm$  SEM,  
4 n = 7-9 per group. The swimming speed in the navigation training was analyzed using Two-way  
5 ANOVA of repeated measures.  
6

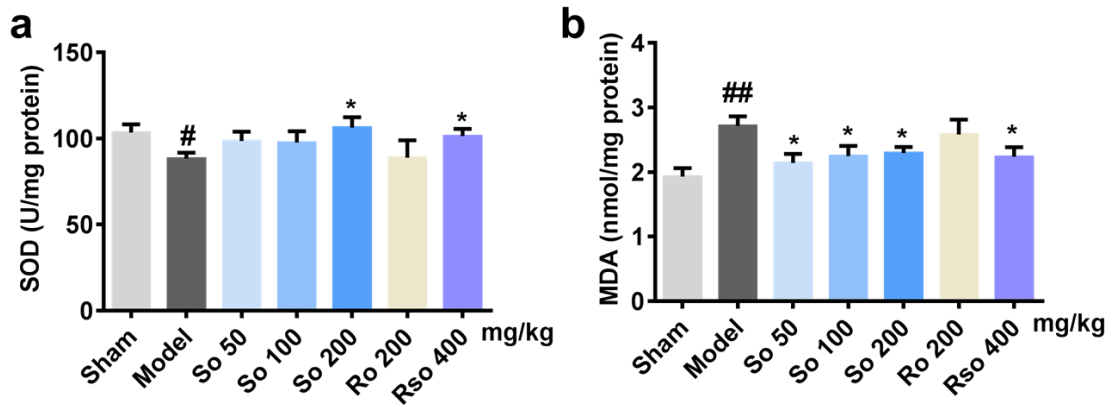

1

2 **Supplementary Figure 4 | (S)- oxiracetam increased SOD activity (a) and decreased MDA**

3 **content (b) in rats' cortex induced by 2-VO.** So: (S)-oxiracetam; Ro: (R)-oxiracetam; Rso:

4 oxiracetam. Data were presented as means  $\pm$  SEM, n = 6-7 per group. One-way ANOVA was used

5 to analyze the differences of groups. <sup>#</sup> $p < 0.05$ , <sup>##</sup> $p < 0.01$  vs. Sham group, <sup>\*</sup> $p < 0.05$  vs. Model

6 group.

7
